# Supplementary material
Source: PubMed Central journal article supplement (PMC4649247)
Supplement: AAC.01729-15_zac012154657so1.pdf [file AAC.01729-15_zac012154657so1.pdf]

**TABLE S1** Primers used in this study

| Primer <sup>a</sup> | Sequence (5'-3')                                                             | Use                                  |
|---------------------|------------------------------------------------------------------------------|--------------------------------------|
| pKD4-ampC_F         | CGCGTAAATTTTGTAGGCCGGGTAAGGCGAAGCCGCCACCCGGCAAAGGTGTGTAGGCTGGAGCTGCTTC       | <i>ampC</i> deletion                 |
| pKD4-ampC_R         | CGAACGTCTGACGGGCCCCGGACATCCCCTTGACTCGCTATTACGGAAGATAACTGCATATGAATATCCTCCTTAG |                                      |
| ampCv_F             | TACCTGAATACCCCCGTCGT                                                         | Verification of <i>ampC</i> deletion |
| ampCv_R             | TACCTGAATACCCCCGTCGT                                                         |                                      |
| pKD4-ampR_F         | CTGACAAACGGTTAAATTTAGCATTAGCTGTTAATTTTTCTAACGGAAGGGACCGTGTAGGCTGGAGCTGCTTC   | <i>ampR</i> deletion                 |
| pKD4-ampR_R         | ACACTGATTGCCGTAGTCACTATCTGACACACCAGGCCCGCCCTCCGGCGGGCCTGCATATGAATATCCTCCTTAG |                                      |
| ampRv_F             | GTGTGGCTGGCCCTGATAAA                                                         | Verification of <i>ampR</i> deletion |
| ampRv_R             | TCCTGCTGGTCGGCATTATG                                                         |                                      |
| pKD4-ampD_F         | AACATGCTACTCTGAACCGAGTAACAGCACCATAACATAAGGAGTTCAGCGTGTAGGCTGGAGCTGCTTC       | <i>ampD</i> deletion                 |
| pKD4-ampD_R         | GTTATCTCCTTATTCTGACGACGCGTAAGCATGGCGCGAAACCGGGGCCATATGAATATCCTCCTTAG         |                                      |
| ampDv_F             | AAGACCTCTTCAACCCAGCG                                                         | Verification of <i>ampD</i> deletion |
| ampDv_R             | AAGAGGCCGTATAACGAGCG                                                         |                                      |
| pKD4-ampE_F         | GGAGATAACATGACGTTGTTTACCATGCTGCTGGTCATCATCGAGAACGGTGTAGGCTGGAGCTGCTTC        | <i>ampE</i> deletion                 |
| pKD4-ampE_R         | ATTTTGGCATCCCGCCTGCAGATACCCGTAACCGCTACGGCACGCGGGTCATATGAATATCCTCCTTAG        |                                      |
| ampEv_F             | GTCTCGATGTATCAGGGGCG                                                         | Verification of <i>ampE</i> deletion |
| ampEv_R             | GCTTTACACAAACGCCGGAA                                                         |                                      |
| pKD4-ampG_F         | TATAATTTGGCCGGTGATTACAACGGGAAATAACCTTTCGCTTTTATCTGTGTAGGCTGGAGCTGCTTC        | <i>ampG</i> deletion                 |
| pKD4-ampG_R         | GTTAATCCTGCTGACTGACCCGGTGTCTACCGGGTCAGTTTTTAAGAACCATATGAATATCCTCCTTAG        |                                      |
| ampGv_F             | TAACGAAAGGACCCCAAGC                                                          | Verification of <i>ampG</i> deletion |
| ampGv_R             | GCTGACGTTTCCCAGGGTAA                                                         |                                      |
| pKD4-ampH_F         | AGTAGTATAAATACCCATTACTTTCCTCATTACACTATGGATGCTTTTCGGTGTAGGCTGGAGCTGCTTC       | <i>ampH</i> deletion                 |
| pKD4-ampH_R         | GGCTGGACGGAGGCGGTAAGCACCTGGGCTTTATTGGCGCTGAGCTCAGCCACATATGAATATCCTCCTTAG     |                                      |
| ampHv_F             | CGCTTTCGGACATACCCTT                                                          | Verification of <i>ampH</i> deletion |
| ampHv_R             | GCCATGCTGCTGAATATGGC                                                         |                                      |
| pKD4-ECL_03254_F    | AGGGCGCGGCTTCTTAAACTGAAAGTCCCTTCTGAACCAAACGAGATAAACGTGTAGGCTGGAGCTGCTTC      | Deletion of ECL_03254                |
| pKD4-ECL_03254_R    | AGGCCCGTGCAAGCGTAGCGCCGCCGGGCAAAACTGGCAGAGCGCTCTATCATATGAATATCCTCCTTAG       |                                      |
| ECL_03254v_F        | CAAAGGCTTTCACCTGACGC                                                         | Verification of ECL_03254 deletion   |
| ECL_03254v_R        | CTGTTTCTGAAAACCTGGCGCA                                                       |                                      |
| pKD4-ECL_03253_F    | GCGTTTCATAGTGCCGGCAGCCGCGACAACGTTTGATTGATCCGTTACGTGTAGGCTGGAGCTGCTTC         | Deletion of ECL_03253                |
| pKD4-ECL_03253_R    | GGGTTATGGGGGAAATCCCCCGAAAAACGGAATGAAGGGAGAGGAAGCGCATATGAATATCCTCCTTAG        |                                      |
| ECL_03253v_F        | GGCGCAAAACAGCATCAAGA                                                         | Verification of ECL_03253 deletion   |
| ECL_03253v_R        | GGTGTGGCCTTTCCTGG                                                            |                                      |
| pKD4-dacB_F         | TTTCGGGTTGTAGCGCGAGATTATGCGATTTTCCAGATTTATCATCGGAGTGTAGGCTGGAGCTGCTTC        | <i>dacB</i> deletion                 |
| pKD4-dacB_R         | CGTAGTTATTCTGGTAGATGTCCTTATAAAGCCTGCTTTCGAAGCGCACCATATGAATATCCTCCTTAG        |                                      |
| dacBv_F             | CAGCTCTTCGCGCAGTTTTT                                                         | Verification of <i>dacB</i> deletion |
| dacBv_R             | CACTGGCTTAACAACGTGGC                                                         |                                      |
| pKD4-nagZ_F         | CGTCTTCTACCACGCTACGCCTTCCGGGAGGATTTACAGGCTGGCTTTAGTGTAGGCTGGAGCTGCTTC        | <i>nagZ</i> deletion                 |
| pKD4-nagZ_R         | GTGGGTCCAGTCATGTTGGATGTAGAAGGGTTGAACTGGATGCGGAGGACATATGAATATCCTCCTTAG        |                                      |
| nagZv_F             | ATCGTCGATGTTGAGCTGCA                                                         | Verification of <i>nagZ</i> deletion |
| nagZv_R             | GCCAAAGACTGATCGGCGAT                                                         |                                      |

|         |                                      |                                     |
|---------|--------------------------------------|-------------------------------------|
| ampC_F  | TAAGCCGTTTCCACCCGTAC                 | Quantification of <i>ampC</i> mRNA  |
| ampC_R  | AGTAAAAGCCTCCTGGGTGC                 |                                     |
| ampR_F  | CCGCGATTGAGCTGAATGTG                 | Quantification of <i>ampR</i> mRNA  |
| ampR_R  | AAGGAGTCATTGAGCACCAGG                |                                     |
| ampC2_F | GACGCCCGCTATCAGGTAA                  | Quantification of <i>ampC2</i> mRNA |
| ampC2_R | CACCGAACGTGATGTCCAGA                 |                                     |
| rpoB_F  | AAGGCGAATCCAGCTTGTTGAGC              | Quantification of <i>rpoB</i> mRNA  |
| rpoB_R  | TGACGTTGCATGTTTCGCACCCATCA           |                                     |
| hsp60-F | GGTAGAAGAAGGCGTGGTTGC <sup>b</sup>   | Sequencing of <i>hsp60</i>          |
| hsp60-R | ATGCATTCGGTGGTGATCATCAG <sup>b</sup> |                                     |
| ampC5_F | CCGTTAGAAAAATTAACAGC                 | Sequencing of <i>ampC</i>           |
| ampC5_R | GTTAAGTGTAGATGACAGCAGG               |                                     |
| ampC6_R | GGCTGTCACCGCGGCATAACAGG              | Sequencing of <i>ampR</i>           |
| ampR4_F | CTCCGTAATAGCGRKTCAAGGG               |                                     |
| ampR4_R | GAATCAAABACCATMACVCGRTG              | Sequencing of <i>ampD</i>           |
| ampD_F2 | CGGCGAGGCGGCATGATAAACTC              |                                     |
| ampD_R2 | CAAGGCGCGAAACCGGGYCCAG               | Sequencing of <i>dacB</i>           |
| dacB_F3 | CGTAGTATGACGGTTTGTTCG                |                                     |
| dacB_F4 | GGCTCCCCGAGGCGCAGTATTGC              | Sequencing of <i>dacB</i>           |
| dacB_R3 | CCTCCTGCAATAACAGATC                  |                                     |

<sup>a</sup> F, Forward primer; R, Reverse primer.

<sup>b</sup> Primer sequences obtained from (3).

**TABLE S2** Summary of RNA-seq data

| Statistics                                          | ECL13047<br>(sample 1) | ECL13047<br>(sample 2) | ECL $\Delta$ <i>dacB</i><br>(sample 1) | ECL $\Delta$ <i>dacB</i><br>(sample 2) |
|-----------------------------------------------------|------------------------|------------------------|----------------------------------------|----------------------------------------|
| Total number of reads                               | 11,302,621             | 11,029,451             | 8,173,417                              | 10,782,033                             |
| Number of uniquely-mapped reads                     | 7,288,398              | 7,232,330              | 5,497,204                              | 6,582,713                              |
| Percentage of unique-mapped reads (%)               | 64.5                   | 65.6                   | 67.3                                   | 61.1                                   |
| Average coverage of the genome <sup>a</sup> (X)     | 137                    | 136                    | 103                                    | 124                                    |
| Percentage of reads mapped to rRNA genes (%)        | 0.01                   | <0.01                  | 0.01                                   | <0.01                                  |
| Number of reads mapped to CDSs                      | 7,287,456              | 7,231,785              | 5,496,566                              | 6,582,107                              |
| Average number of mapped reads per CDS <sup>b</sup> | 1411                   | 1390                   | 1064                                   | 1274                                   |

<sup>a</sup> The genome size of ECL13047 is 5,314,581 bp.

<sup>b</sup> The number of predicted coding sequences (CDSs) is 5,166.
